# Supplementary material for: Identifying genes and regulatory pathways associated with the scleractinian coral calcification process
Source: PeerJ. 2017 Jul 20;5:e3590. doi: 10.7717/peerj.3590 (PMC5522607; doi:10.7717/peerj.3590)
Supplement: File S1 [file peerj-05-3590-s001.xlsx]

## Sheet: Calcification Rates
mmol CaCO3 h-1 cm-2
Treatment	# Fragment	11:00:00	23:00:00
SW	1	0.15	0.09
	2	0.11	0.05
	3	0.16	0.02
	4	0.08	0.03
SW+!00	1	0.27	0.01
	2	0.13	0.02
	3	0.15	0.08
	4	0.22	0.05
SW+200	1	0.27	0.05
	2	0.18	0.05
	3	0.33	0.08
	4	0.24	0.09
